# Supplementary material for: Reiterative infusions of MSCs improve pediatric osteogenesis imperfecta eliciting a pro‐osteogenic paracrine response: TERCELOI clinical trial
Source: PubMed Central journal article supplement (PMC7805402; doi:10.1002/ctm2.265), 2021-01-13

FIG. S1

A

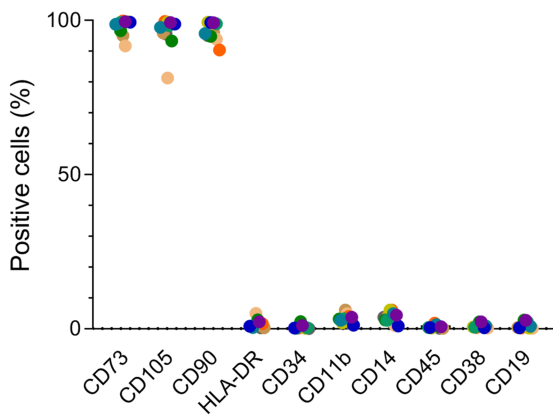

B

### oi-MSCs

OSTEOGENESIS (Alizarin Red; day 14)

ADIPOGENESIS (day 21)

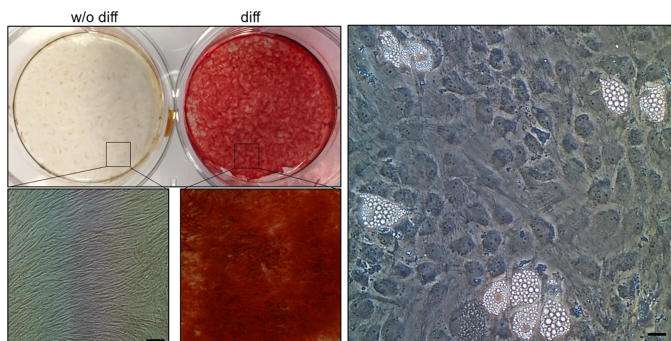

Supplement: CTM2-11-e265-s001.pdf [file CTM2-11-e265-s001.pdf]
